# Supplementary material for: Strain in a single wrinkle on an MoS2 flake for in-plane realignment of band structure for enhanced photo-response
Source: Royal Society of Chemistry journal article supplement (doi:10.1039/c8nr05884a), 2018-11-26
Supplement: c8nr05884a1.pdf [file c8nr05884a1.pdf]

## Electronic Supplementary Information

### Strain in Single-Wrinkle on MoS<sub>2</sub>-Flake for in-Plane Realignment of Band-Structure for Enhanced Photo-Response

*Shikai Deng, Songwei Che, Rousan Debbarma and Vikas Berry\**

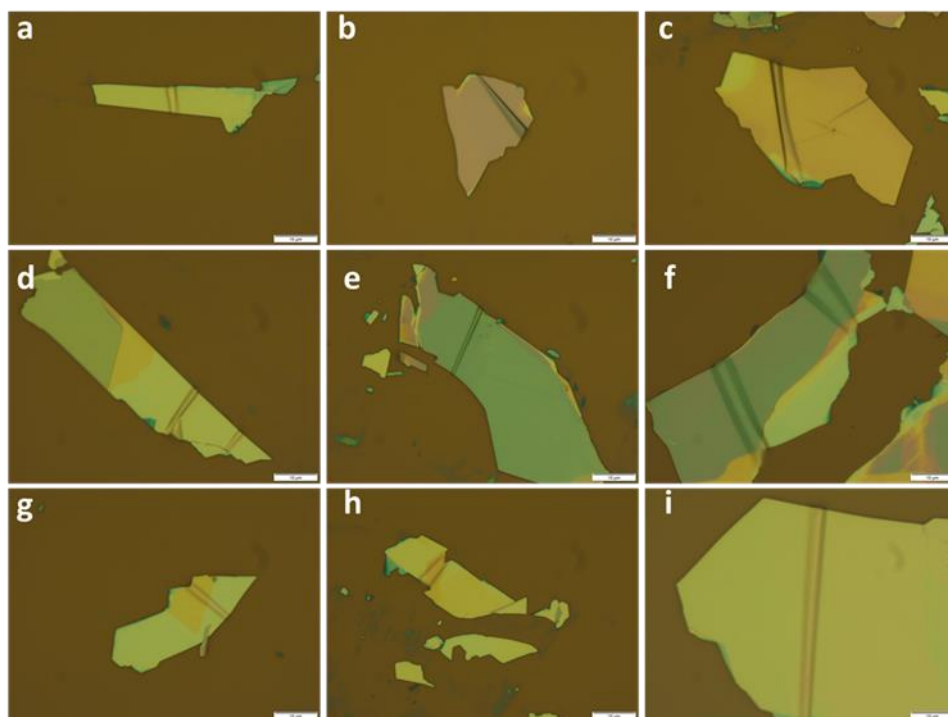

**Figure S1.** Optical images of some wrinkled MoS<sub>2</sub>. Scale bars are 10 $\mu$ m.

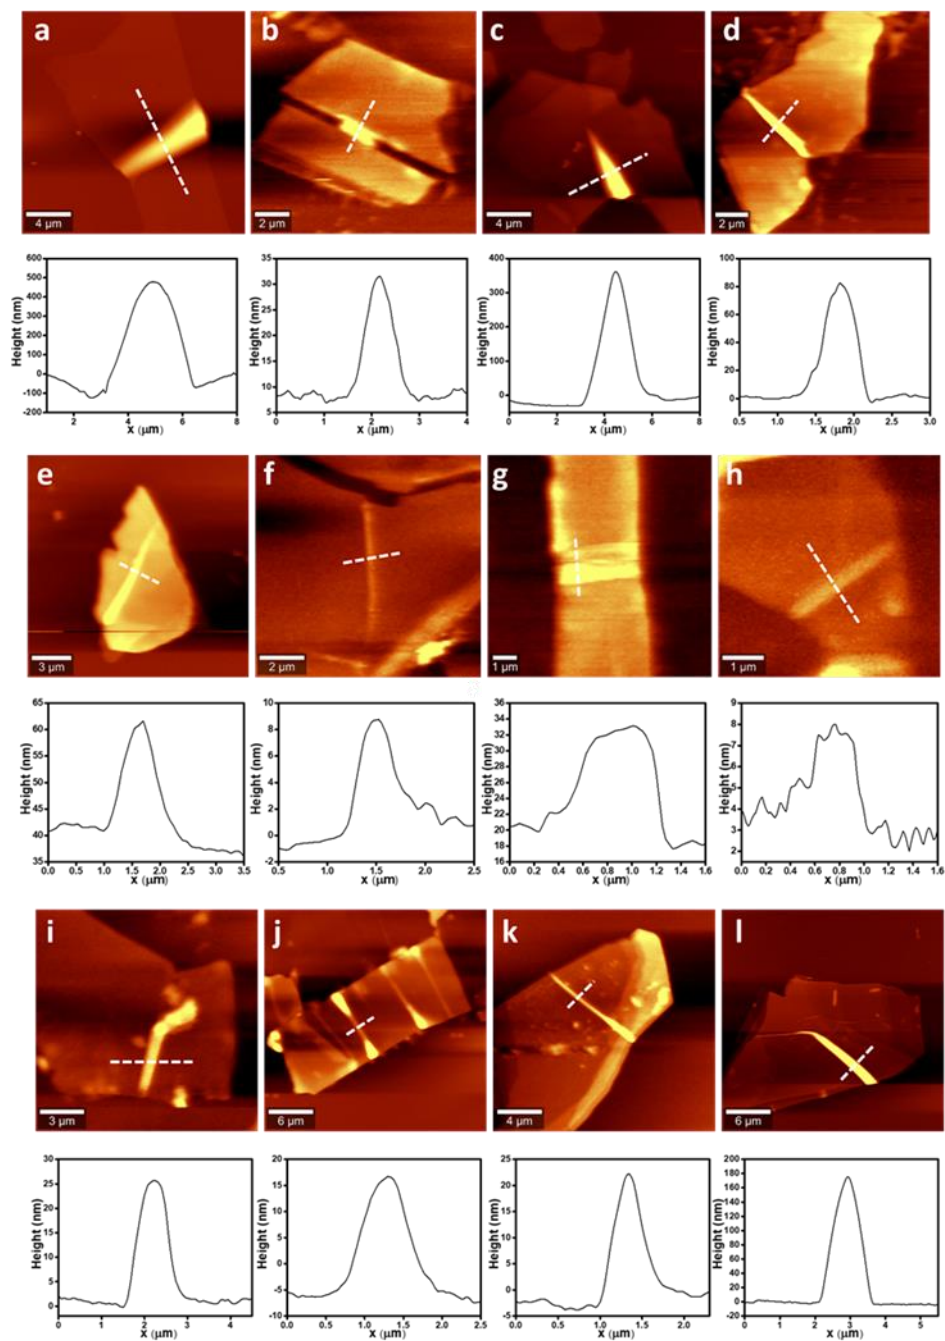

Figure S2. AFM characterization of wrinkled MoS<sub>2</sub> samples.

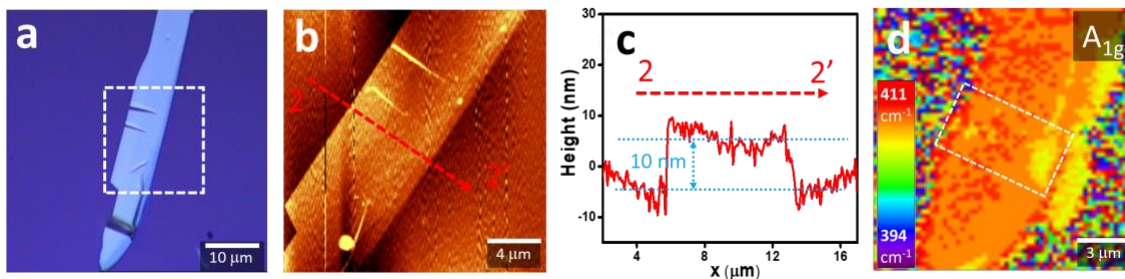

**Figure S3. Wrinkled MoS<sub>2</sub> on SiO<sub>2</sub>.** (a) An optical image of a wrinkled MoS<sub>2</sub>. (b) Atomic force microscopy characterization image of the wrinkled park of MoS<sub>2</sub> in (a). (c) Height profile of MoS<sub>2</sub> flake along the red dashed line (2-2') in (b). (d) Raman position mapping of A<sub>1g</sub> mode.

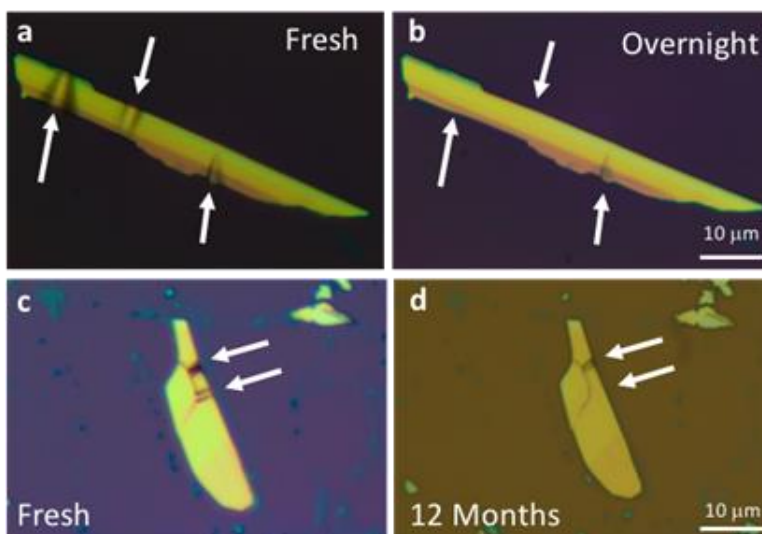

**Figure S4. Wrinkles flattening and disappearing through sliding.** (a) A fresh optical image of a wrinkled MoS<sub>2</sub>. (b) Same MoS<sub>2</sub> flakes in (a) after overnight without any treatment. (c) A fresh optical image of a wrinkled MoS<sub>2</sub>. (b) Same MoS<sub>2</sub> flakes in (c) after 12 months without any treatment. Arrows indicate the positions of wrinkles in fresh wrinkled MoS<sub>2</sub>.

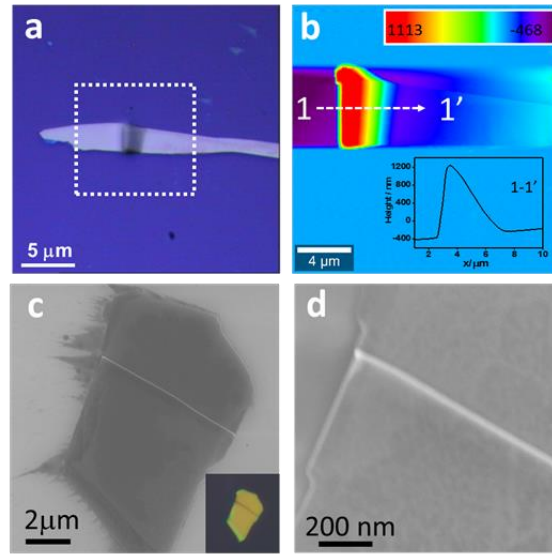

**Figure S5. Asymmetric Wrinkled MoS<sub>2</sub> on SiO<sub>2</sub>.** (a) Optical image of an asymmetric wrinkle in MoS<sub>2</sub>. (b) AFM characterization of the same wrinkled MoS<sub>2</sub> flake in (a), insert is the height profile along the dashed line (1-1'). (c) and (d) SEM characterization of an asymmetric wrinkle. Insert is the optical image of the same flake in (c).

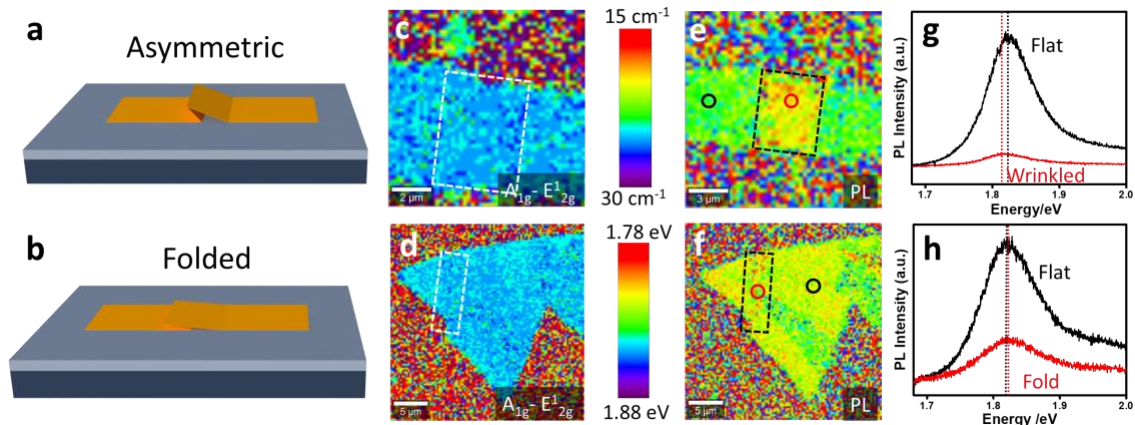

**Figure S6. Raman and Photoluminescence spectroscopy of different kinds of wrinkled MoS<sub>2</sub>.** (a) to (b) Schematic of the asymmetric (a) and folded (b) wrinkles in MoS<sub>2</sub>. (c) to (d) Raman position difference between E<sup>1</sup><sub>2g</sub> mode and A<sub>1g</sub> mode (A<sub>1g</sub> - E<sup>1</sup><sub>2g</sub>) of the asymmetric (c) and folded

(d) wrinkles in MoS<sub>2</sub>. (e) to (f) PL energy mappings of A exciton peak for the asymmetric (e) and folded (f) wrinkles in MoS<sub>2</sub>. The black dashed rectangles are the effected wrinkled regions. (g) to (h) PL spectra profiles measured on a flat (black) and on a wrinkled (red) regions.

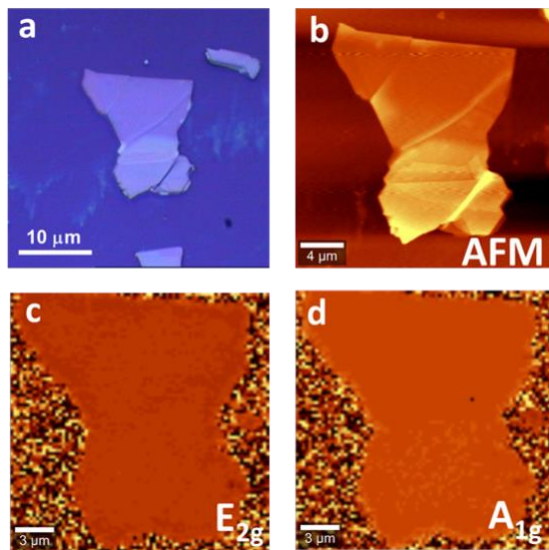

**Figure S7. Small wrinkles in MoS<sub>2</sub> on SiO<sub>2</sub>.** (a) Optical image of a small wrinkle in MoS<sub>2</sub>. (b) AFM characterization image of the same wrinkle in (a). (c) and (d) Raman position mapping of E<sub>2g</sub> mode and A<sub>1g</sub> mode, respectively.

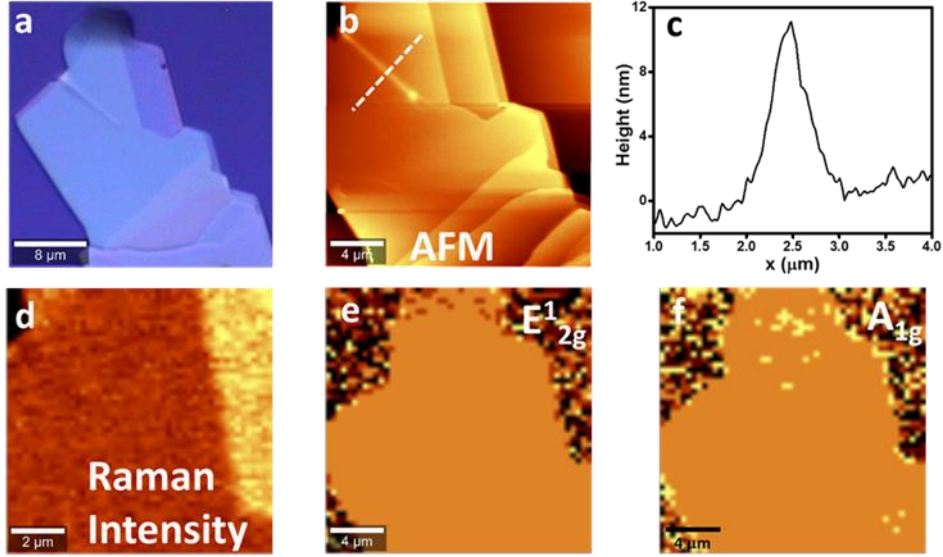

**Figure S8. Small wrinkles in MoS<sub>2</sub> on SiO<sub>2</sub>.** (a) Optical image of a small wrinkle in MoS<sub>2</sub>. (b) Atomic force microscopy characterization image of the same wrinkled in (a). (c) Height profile of along the dashed line in (b). (d) Raman intensity of wrinkled region in MoS<sub>2</sub>. Raman position mapping of E<sup>1</sup><sub>2g</sub> (e) and A<sub>1g</sub> (f).

### Raman and Photoluminescence versus deformation

$$\Delta = \frac{3\gamma\lambda^3}{2\pi^2 E t^3 L_p} \quad (\text{S1})$$

The shift of E<sup>1</sup><sub>2g</sub> peak position for this wrinkle is ~ 2 cm<sup>-1</sup> as shown in Figure S2c. Plugging this into the relationship between deformation and mode position shift (2 cm<sup>-1</sup>/‰ deformation),<sup>1</sup> the estimated deformation is ~ 1%. This is consistent with the deformation obtained from the Eq. 2, which is ~1.11%. The red shift of PL A peak is about 45 meV, which means the band gap reduction is about 47.6 meV/‰ deformation. The deformation of the wrinkle in Figure 1 is ~ 0.55 ‰, and the



reduction of optical band gap in this wrinkle is  $\sim 33.9$  meV or 61 meV% deformation. More PL versus deformation data are shown in Figure S1.

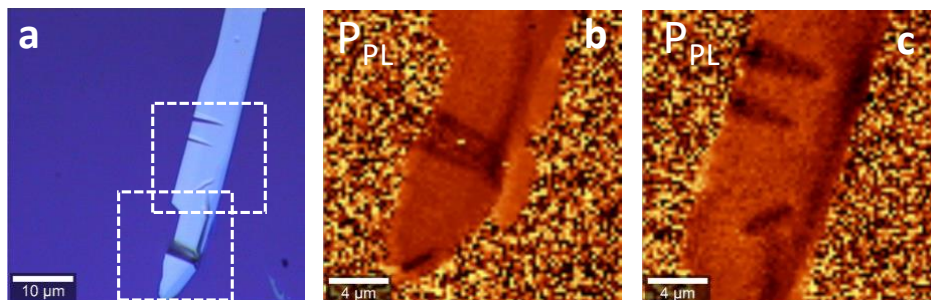

**Figure S9. Wrinkled MoS<sub>2</sub> on SiO<sub>2</sub> and photoluminescence spectroscopy of wrinkled MoS<sub>2</sub>.**

(a) Optical image of a MoS<sub>2</sub> flake with several wrinkles. (b) and (c) PL energy mappings of A exciton peak of square regions in (a). The wrinkled induced reduction of optical band gap is clear shown in (b) and (c). And the widths of band gap modified regions are much larger than the width of the wrinkles.

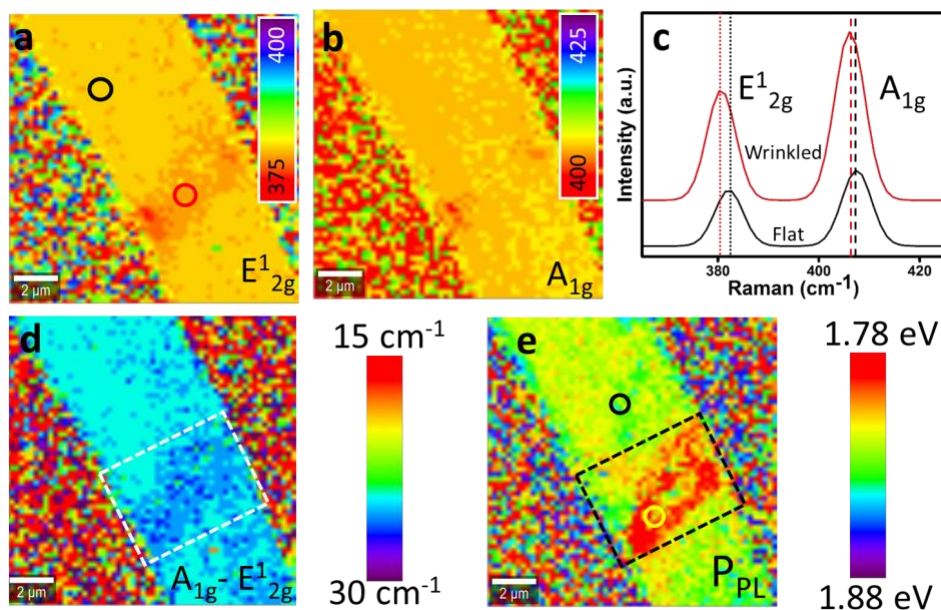

**Figure S10. Raman and PL position mapping of symmetric wrinkles in MoS<sub>2</sub> on SiO<sub>2</sub>.** (a) and (b) Raman position mapping of E<sub>12g</sub> mode and A<sub>1g</sub> mode, respectively. The A<sub>1g</sub> mode is less

affected than the  $E^{1_{2g}}$ . White dashed squares are wrinkled regions. The units of the scale bars in (a) and (b) are  $\text{cm}^{-1}$ . (c) Typical Raman spectra for wrinkled (red) and flat (black)  $\text{MoS}_2$ . Dotted lines and dashed lines are the positions of  $E^{1_{2g}}$  mode and  $A_{1g}$  mode, respectively. (d) Raman position mapping difference between  $E^{1_{2g}}$  mode and  $A_{1g}$  mode ( $A_{1g} - E^{1_{2g}}$ ). White dashed rectangle is wrinkle effected region. (e) PL energy mapping of A exciton peak. Black dashed rectangle is wrinkle effected region. Note: the size characterization of this is shown a previous study.<sup>2</sup>

The larger red-shift of the  $E^{1_{2g}}$  peak than the  $A_{1g}$  peak in the wrinkled region of symmetric wrinkles leads to a slight increase in the difference between the two peaks positions ( $A_{1g} - E^{1_{2g}}$ ). However, in asymmetrical and folded  $\text{MoS}_2$ , the difference between these two peak-positions remains nominally unchanged as shown in the  $A_{1g} - E^{1_{2g}}$  mappings. Although the asymmetric wrinkle (Figure S4b) shows a higher mechanical plane deformation than the symmetric one (Figure 1e), the red shift of the A peak (30 meV) in symmetric wrinkle is higher than that (10 meV) in the asymmetric one (Figure 2j, 2k). The PL peak position shows no change for the case of folded wrinkles (Figure 2l). Further, the photoluminescence-modification is localized in asymmetric wrinkles (4.5  $\mu\text{m}$ , as shown in Figure 2), however, the photoluminescence is modified (4  $\mu\text{m}$ ) in a region 2-5 times larger than the width of symmetric wrinkle (0.8  $\mu\text{m}$ ), as shown in Figure 2g, S8, and S9.

**Table S1 Photoluminescence versus deformation**

| Width (nm) | Thickness (nm) | Projection Length (nm) | Deformation (%) | PL Shift (meV) | PL Shift /Deformation (meV/%) |
|------------|----------------|------------------------|-----------------|----------------|-------------------------------|
| 1157       | 13.9           | 10000                  | 0.55            | 33.9           | 61.4                          |
| 629        | 10.1           | 3620                   | 0.63            | 30             | 47.0                          |



|      |      |       |      |      |      |
|------|------|-------|------|------|------|
| 526  | 10.6 | 3620  | 0.32 | 19.1 | 59.1 |
| 2082 | 19.8 | 30000 | 0.37 | 20   | 53.9 |
| 385  | 10   | 998   | 0.54 | 27.8 | 50.8 |
| 2206 | 21   | 10000 | 1.11 | 47.6 | 42.9 |
| 721  | 10.5 | 5788  | 0.37 | 25.8 | 48.2 |

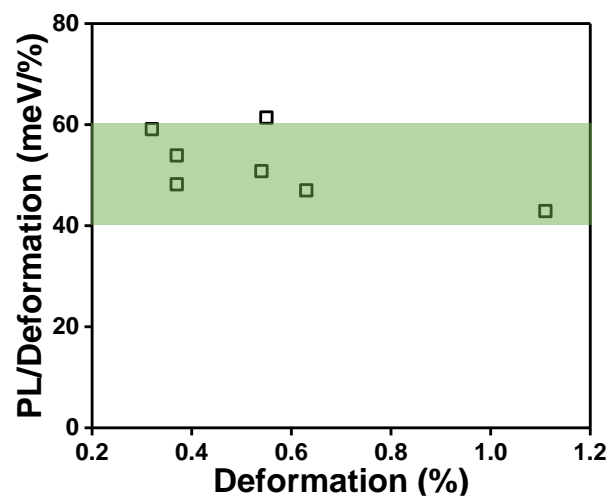

**Figure S11.** PL versus deformation in MoS<sub>2</sub> flakes.

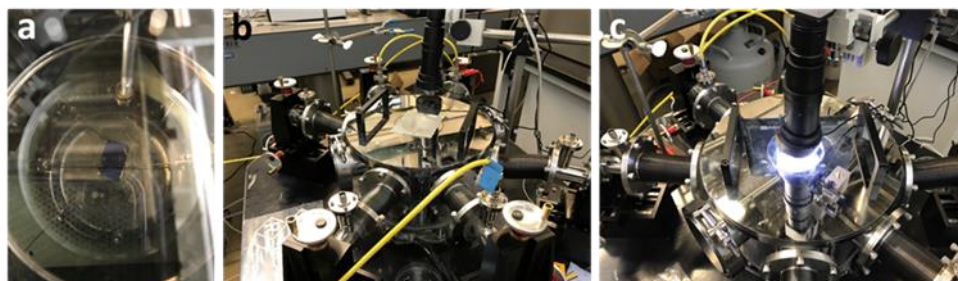

**Figure S12. Electrical characterization experiment setup.** (a) Electrodes Connection on the device. (b) and (c) Electrical characterization in dark and light conditions, respectively.

**Additional Devices Characterization (wrinkled and flat devices on the SAME flake)**

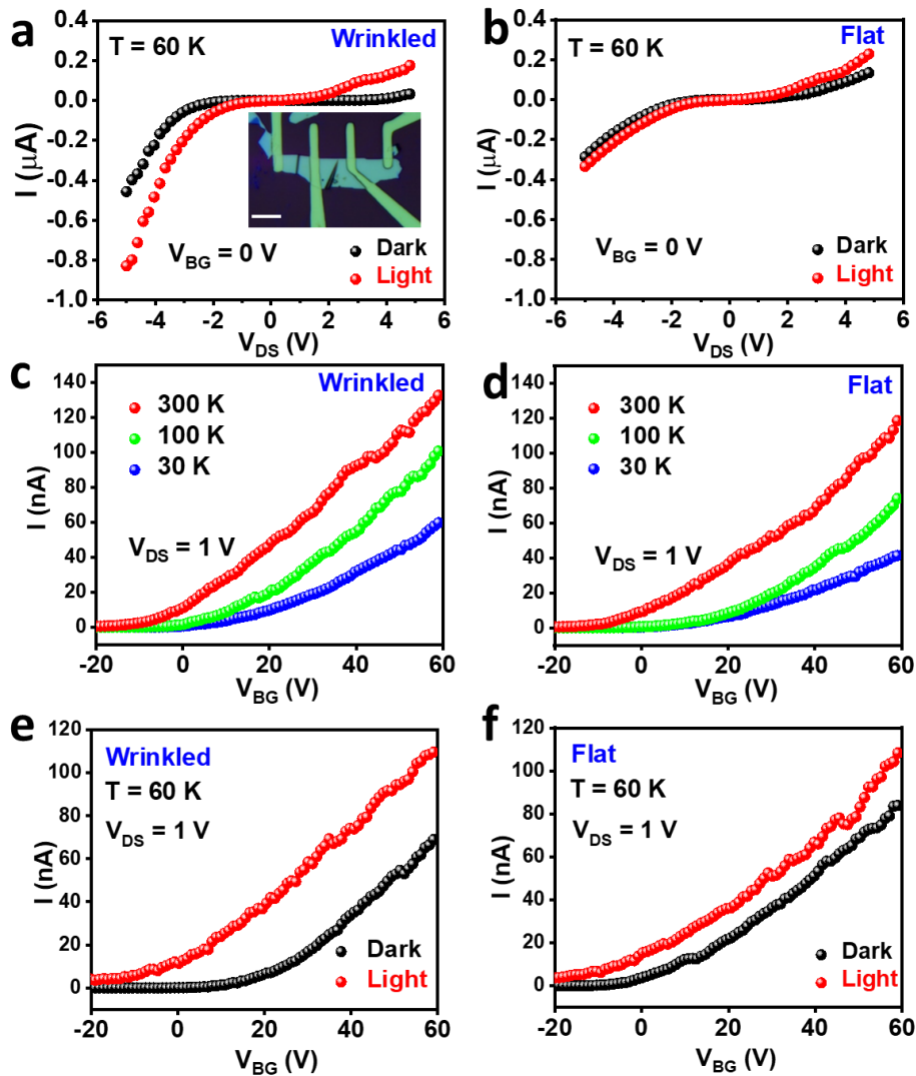

**Figure S13. Device Characterization of Device 2.** Source-drain current under bias of single-wrinkle (a) and flat (b) device at dark and light conditions. Scale bar in inset is  $10\ \mu\text{m}$ . Source-drain current in linear scale versus back gating voltage at different temperatures for single-wrinkle (c) and flat (d) MoS<sub>2</sub> devices. source-drain current versus back gating voltage at 60K for single-wrinkle (e) and flat devices (f).

**Table S2. Photo-response of single-wrinkle and flat devices**

|                 | ON/OFF ratio |          |          |          | Photo-response |          |
|-----------------|--------------|----------|----------|----------|----------------|----------|
|                 | Device 1     |          | Device 2 |          | Device 1       | Device 2 |
|                 | Dark         | Light    | Dark     | Light    |                |          |
| <b>Flat</b>     | 2.90E+04     | 1.80E+03 | 1.30E+03 | 2.80E+01 | 1.1            | 1.2      |
| <b>Wrinkled</b> | 3.80E+04     | 2.90E+03 | 3.30E+03 | 3.00E+01 | 1.5            | 1.8      |

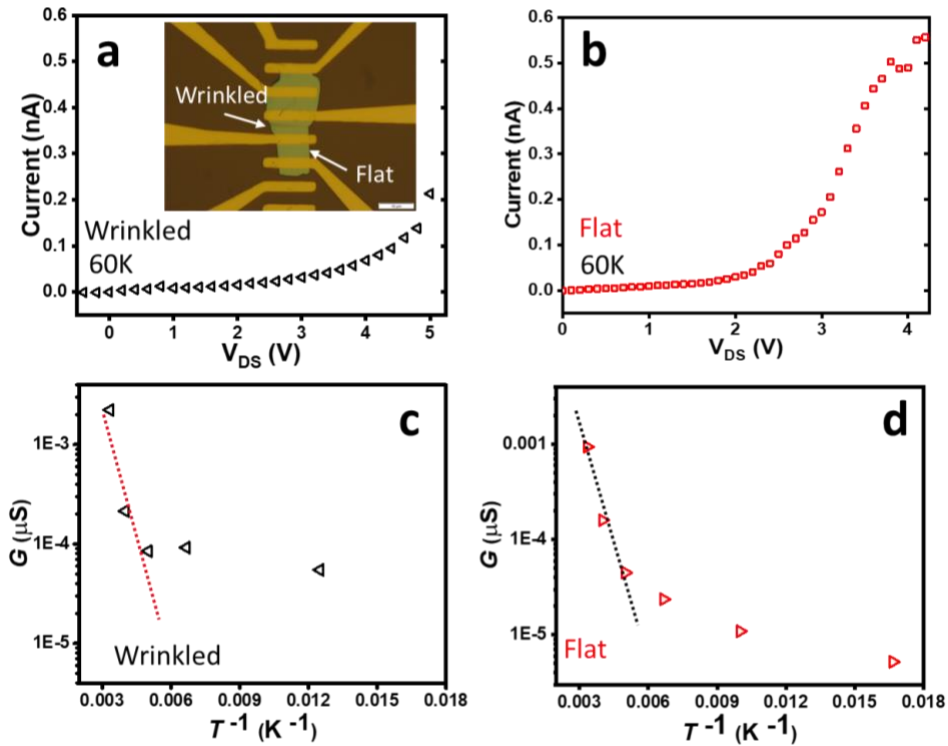

**Figure S14.  $I_{DS}$ - $V_{DS}$  (source-drain current versus source-drain voltage) characterization and temperature study of single-wrinkle and flat MoS<sub>2</sub> devices. (a) and (b)  $I_{DS}$  versus  $V_{DS}$  at 60K for wrinkled and flat MoS<sub>2</sub> devices, respectively. Data have been calibrated to exclude to instrumental errors. (c) and (d) Arrhenius plots for wrinkled and flat MoS<sub>2</sub> devices, respectively.**

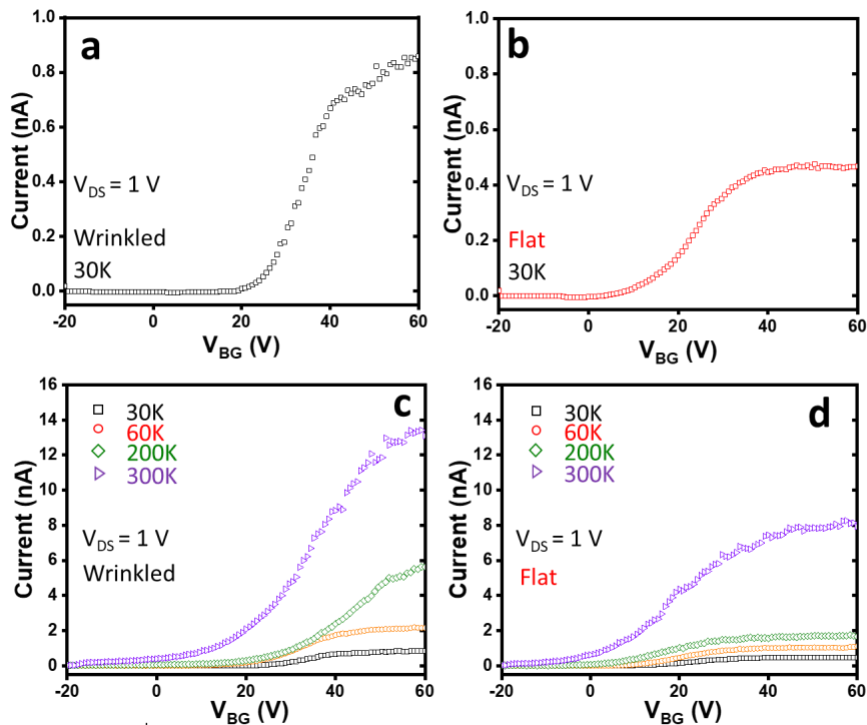

**Figure S15.  $I_{DS}$ - $V_{BG}$  (source-drain current versus back gating voltage) characterization and temperature studies of single-wrinkle and flat MoS<sub>2</sub> devices.** (a) and (b)  $I_{DS}$  versus  $V_{BG}$  at 30K for wrinkled and flat MoS<sub>2</sub> devices, respectively. Insert is the optical image of tested device and the scale bar is 10  $\mu\text{m}$ . (c) and (d)  $I_{DS}$  in linear scale versus  $V_{BG}$  at different temperatures for wrinkled and flat MoS<sub>2</sub> devices, respectively.

## TRANSPORT BARRIERS CALCULATION

To determine the transport-barrier, the temperature dependence of the electrical conductivity at different gate voltages was analyzed (Figure 3h and 3i). The conduction behavior was found to be different for high temperature (200 to 300 K) and low temperature (15 to 200 K) ranges (Figure 3h and 3i). This is because at high temperature the charge transport is thermally activated and at low temperature the transport is dominated by hopping of localized states.<sup>37,38</sup> The activation energy

$(G \propto \exp(\frac{E_A}{kT}))$  ( $G$  is conductance,  $E_A$  is the activation energy and  $kT$  is the thermal energy) was 162.1 meV and 153.6 meV (at  $V_{DS} = 0 V$ ) for the wrinkled and flat MoS<sub>2</sub> devices at high temperature range (200 to 300 K), respectively. This indicates a >8 meV increase of barrier for the in-plane carrier-flow across the MoS<sub>2</sub> wrinkle.

**Table S3 Transport barriers in temperature study**

| <b>T</b> | <b>1/kT</b>              | <b>Ln(R<sub>F</sub>)</b> | <b>T</b> | <b>1/kT</b>              | <b>Ln(R<sub>w</sub>)</b> |
|----------|--------------------------|--------------------------|----------|--------------------------|--------------------------|
| <b>K</b> | <b>(eV)<sup>-1</sup></b> |                          | <b>K</b> | <b>(eV)<sup>-1</sup></b> |                          |
| 60       | 193.4087086              | 25.98119926              | 80       | 145.0565314              | 23.62627652              |
| 100      | 116.0452251              | 25.24123945              | 100      | 116.0452251              |                          |
| 150      | 77.36348343              | 24.46831722              | 150      | 77.36348343              | 23.10884118              |
| 200      | 58.02261257              | 23.82757129              | 200      | 58.02261257              | 23.19022309              |
| 250      | 46.41809006              | 22.55733813              | 250      | 46.41809006              | 22.26135353              |
| 300      | 38.68174172              | 20.78403305              | 300      | 38.68174172              | 19.91942811              |

We have:

$$\ln(R) \propto \left(\frac{E_A}{kT}\right) \quad (2)$$

Based on the slopes of  $\ln(R) \propto \left(\frac{1}{kT}\right)$  plots at high temperature regions (200 to 300 K), we can have the transport barriers of two kinds of devices.

### **Additional Devices Characterization (wrinkled and flat devices on DIFFERENT flakes)**

**Note: The different colors in optical images are due to changes of contrast set-up in optical microscope, as shown the different gold electrodes color**

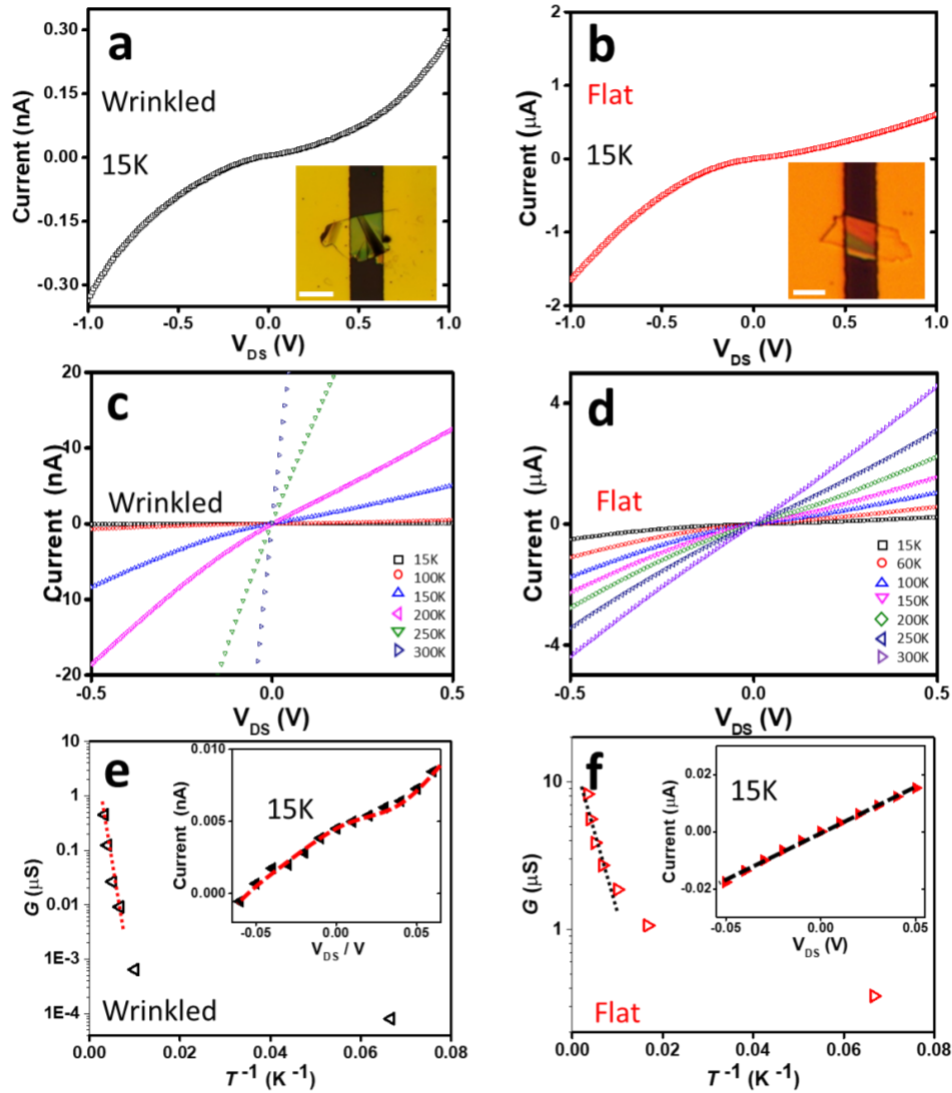

**Figure S16.  $I_{DS}$ - $V_{DS}$  characterization and temperature study of wrinkled and flat MoS<sub>2</sub> devices.** (a) and (b) Source-drain current ( $I_{DS}$ ) versus source-drain voltage ( $V_{DS}$ ) at 15K. Inserts are optical images of single wrinkled and flat MoS<sub>2</sub> devices, scale bars are 20  $\mu$ m. (c) and (d) Source-drain current ( $I_{DS}$ ) versus source-drain voltage ( $V_{DS}$ ) at different temperatures for wrinkled and flat MoS<sub>2</sub> devices, respectively. (e) and (f) Active energy studies of wrinkled and flat MoS<sub>2</sub> devices, respectively. The inserts are the typical  $I_{DS}$  versus  $V_{DS}$  at 15K for wrinkled and flat MoS<sub>2</sub> devices, respectively.



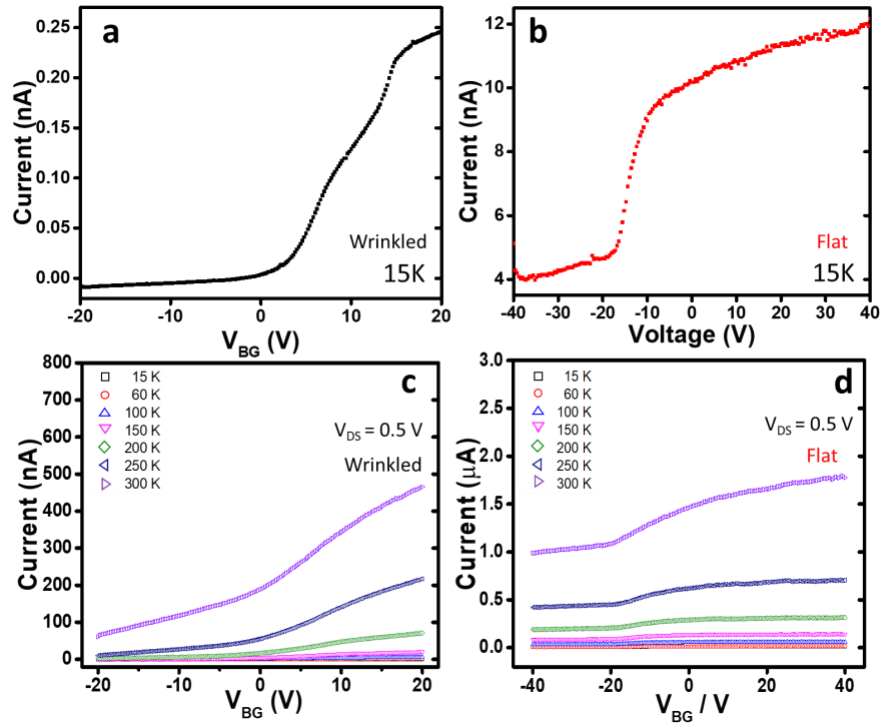

**Figure S17.  $I_{DS}$ - $V_{BG}$  characterization and temperature studies of wrinkled and flat  $\text{MoS}_2$  devices.** (a) and (b) Source-drain current ( $I_{DS}$ ) versus back gating voltage ( $V_{DS}$ ) at 15 K for wrinkled and flat  $\text{MoS}_2$  devices, respectively. (c) and (d) Source-drain current ( $I_{DS}$ ) in linear scale versus back gating voltage ( $V_{BG}$ ) at different temperatures for wrinkled and flat  $\text{MoS}_2$  devices, respectively.

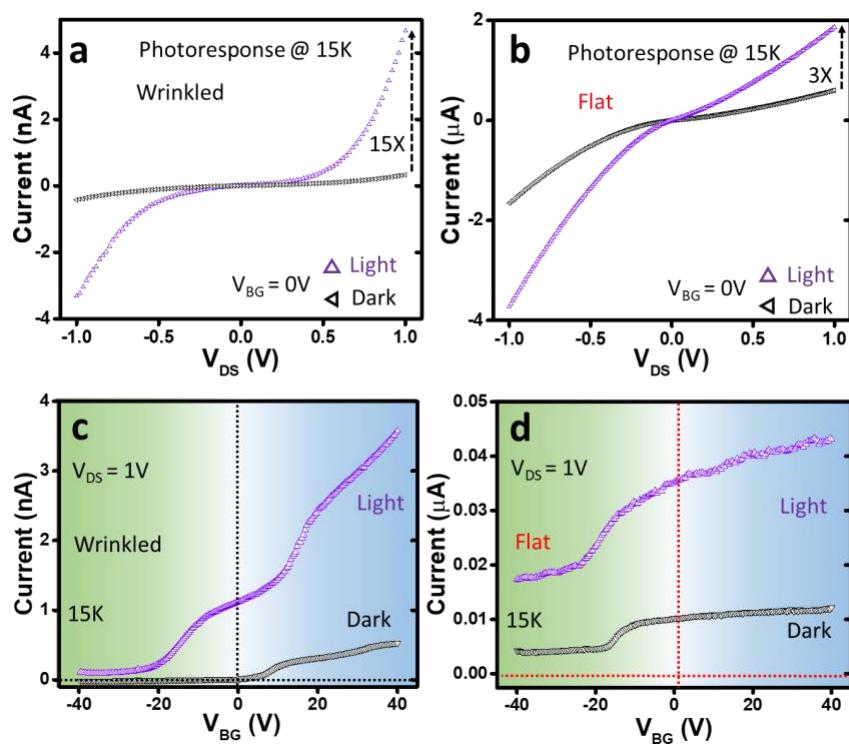

**Figure S18. Photo-response studies of wrinkled and flat MoS<sub>2</sub> devices.** (a) and (b) Photo-response studies of wrinkled and flat MoS<sub>2</sub> devices without gating at 15 K, respectively. (c) and (d) Typical source-drain current ( $I_{DS}$ ) versus back gating voltage ( $V_{DS}$ ) at 15 K for wrinkled and flat MoS<sub>2</sub> devices, respectively.

## MOBILITY CALCULATION:

The mobility data at  $V_{DS} = 1V$  and  $V_{BG} = 0V$  at 300K in Figure 3 of the main text was applied.

The mobility in flat MoS<sub>2</sub>:

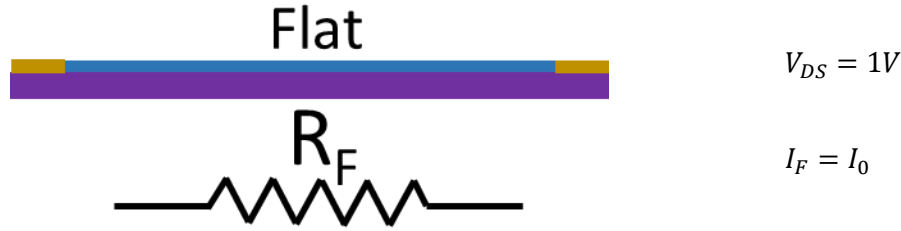

The back gated field-effect mobility of these MoS<sub>2</sub> devices can be estimated based on the equation:<sup>5</sup>

$$\mu = \frac{L}{W \left( \frac{\epsilon_r \epsilon_0}{D} \right) V_{DS}} \frac{dI_{DS}}{dV_{BG}} \quad (3)$$

Where,  $L$  and  $W$  are the length and width of MoS<sub>2</sub> channel, respectively;  $\epsilon_r$  is relative permittivity and  $\epsilon_0$  is vacuum permittivity ( $8.854 \times 10^{-12}$  F·m<sup>-1</sup>), and  $D$  is the gate-oxide thickness. There are two dielectric layers in series (285 nm of SiO<sub>2</sub> and an layer of air) in wrinkled part of MoS<sub>2</sub>.

The mobility in flat devices:

$$\mu_F = \frac{L}{W \left( \frac{\epsilon_{SiO_2} \epsilon_0}{D} \right) V_{DS}} \frac{dI_{DS}}{dV_{BG}} = \frac{3}{10 \left( \frac{3.9 \times 8.854 \times 10^{-12}}{285 \times 10^{-9}} \right) 1} \times 0.142 \times 10^{-6} \times 10^4$$

$$= 3.516 \text{ cm}^2\text{V}^{-1}\text{S}^{-1}$$

| Devices (Flat) | L/W | dI/dV(A/V) | V <sub>DS</sub> (V) | Mobility (cm <sup>2</sup> V <sup>-1</sup> S <sup>-1</sup> ) |
|----------------|-----|------------|---------------------|-------------------------------------------------------------|
| 1              | 0.3 | 1.42E-07   | 1                   | 3.516                                                       |
| 2              | 0.3 | 2.6905E-08 | 1                   | 0.666                                                       |
| 3              | 1.6 | 9.8882E-09 | 1                   | 1.306                                                       |
| 4              | 1.6 | 1.5399E-09 | 1                   | 0.203                                                       |

The mobility in wrinkled MoS<sub>2</sub>:

The resistant of flat parts ( $R_{F1}$  and  $R_{F2}$ ) in wrinkled device compared to the resistance of flat device:

$$R = \frac{L}{ne\mu A} \quad (4)$$

Assume the flat parts of MoS<sub>2</sub> and MoS<sub>2</sub> in flat devices have same ( $n$ ,  $\mu$  and  $A$ ), also  $L_{F1} + L_{F2} = 0.66 L_F$ , so we have:

$$\frac{R_{F1} + R_{F2}}{R_F} = \frac{0.66}{1}$$

Combine the current relationship in two kinds of devices ( $I_F = 10I_W$  under  $V_{DS} = 1V$  and  $V_{BG} = 0V$  at 30K), so the voltage drops of wrinkled part ( $R_W$ ) is:  $\Delta V_W = V_{DS} - 0.66 \times 0.1 = 0.934V$ ;

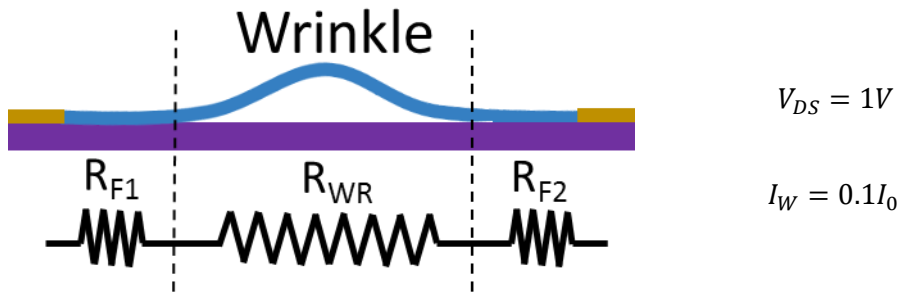

We can apply different a model to calculate the capacitance of the gate in the wrinkled MoS<sub>2</sub> devices:

Considering the wrinkled MoS<sub>2</sub> as a cylinder on a conducting plate:<sup>6,7</sup>

$$\mu_W = \frac{2L_W W}{\Delta V_W C_g} \frac{dI_{DS}}{dV_{BG}}$$

Where  $L_W$  is the length of the wrinkle, and  $2L_W$  is the wrinkled affect length,  $W$  is the width of the channel,  $C_g$  is the capacitance of the gate.

Back gate capacitance per unit length in this cylinder on a plate model:

$$\frac{C_g}{W} = \frac{2\pi\epsilon_{ox}\epsilon_0}{\cosh^{-1}\left(\frac{r+h}{r}\right)}$$

where  $r$  is the wrinkles radius (25 nm),  $h$  is the SiO<sub>2</sub> thickness (285 nm), and  $\epsilon_{ox}$  is the SiO<sub>2</sub> dielectric constant ( $\epsilon_{ox}=3.9$ ).

$$\text{so: } \mu_W = \frac{L_W}{\Delta V_W} \frac{2\pi\epsilon_{ox}\epsilon_0}{\cosh^{-1}\left(\frac{r+h}{r}\right)} \frac{dI_{DS}}{dV_{BG}} = \frac{0.8 \times 10^{-6}}{0.934 \times \frac{2\pi \times 3.9 \times 8.854 \times 10^{-12}}{\cosh^{-1}\left(\frac{25+285}{25}\right)}} \times 0.151 \times 10^{-6} \times 10^4 = 19.131 \text{ cm}^2\text{V}^{-1}\text{S}^{-1}$$

| Devices (Wrinkled) | L (m)   | dI/dV(A/V) | V <sub>DS</sub> (V) | Mobility (cm <sup>2</sup> V <sup>-1</sup> S <sup>-1</sup> ) |
|--------------------|---------|------------|---------------------|-------------------------------------------------------------|
| 1                  | 8E-07   | 1.51E-07   | 0.934               | 19.131                                                      |
| 2                  | 7E-07   | 9.6672E-09 | 0.934               | 1.072                                                       |
| 3                  | 1.2E-06 | 9.1193E-09 | 0.98                | 1.652                                                       |
| 4                  | 1.2E-06 | 1.8761E-09 | 0.98                | 0.340                                                       |

**Table S4 Mobilities of flat and wrinkled devices**

| Devices | Mobility (cm <sup>2</sup> V <sup>-1</sup> S <sup>-1</sup> ) |          |
|---------|-------------------------------------------------------------|----------|
|         | Flat                                                        | Wrinkled |
| 1       | 0.67                                                        | 1.07     |
| 2       | 1.31                                                        | 1.65     |
| 3       | 0.20                                                        | 0.34     |
| 4       | 3.52                                                        | 19.13    |
| Average | 1.42                                                        | 5.55     |

$$\mu_W \approx 3.9 \mu_F$$

We apply  $\mu_W = x\mu_F$  in the following calculations and demonstrations.

Doping Concentration:

$$R = \frac{L}{ne\mu A}$$

$$\mu_W \approx x\mu_F$$

$$\frac{R_F}{R_W} = \frac{\frac{L_F}{n_F}}{\frac{L_{F1} + L_{F2}}{n_F} + \frac{L_{WR}}{xn_{WR}}} \approx \frac{1}{10}$$

With  $L_F = 5 L_W$

$$\frac{\frac{3}{n_F}}{\frac{2}{n_F} + \frac{1}{xn_{WR}}} = \frac{1}{10}$$

$$x \approx 3.9$$

$$n_F = 13x n_{WR} = 50.7 n_{WR}$$

$$n_F \approx 10^{13} \text{ cm}^{-2}$$

$$\text{So } n_{WR} \approx 1.97 \times 10^{11}$$

### Fresnel Effect at Wrinkled Flakes

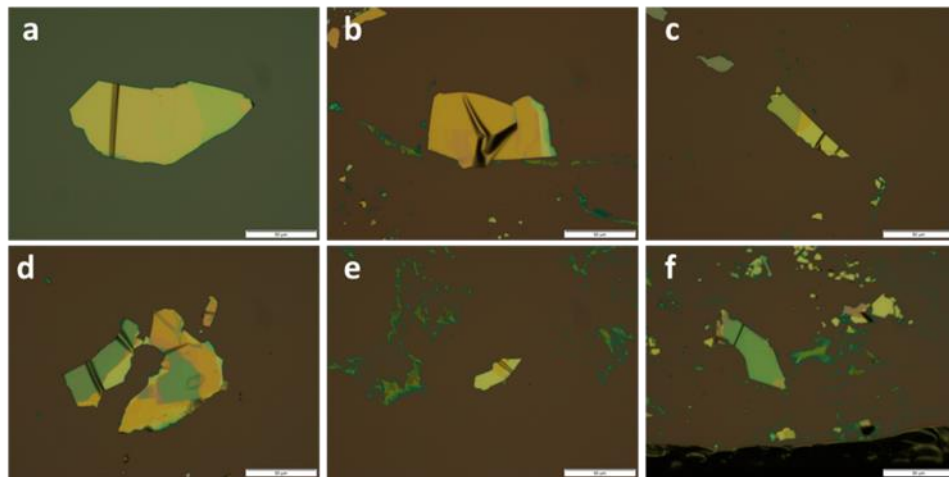

**Figure S19.** Examples of Fresnel effect on wrinkled part of MoS<sub>2</sub>. Scale bars are 50 $\mu$ m.



For non-magnetic media, Fresnel equations have forms for reflectance of s-polarized light and p-polarized lights:

$$R_s = \left| \frac{n_1 \cos \theta_i - n_2 \sqrt{1 - \left(\frac{n_1}{n_2} \sin \theta_i\right)^2}}{n_1 \cos \theta_i + n_2 \sqrt{1 - \left(\frac{n_1}{n_2} \sin \theta_i\right)^2}} \right|^2 \quad (\text{S2})$$

$$R_p = \left| \frac{n_1 \sqrt{1 - \left(\frac{n_1}{n_2} \sin \theta_i\right)^2} - n_2 \cos \theta_i}{n_1 \sqrt{1 - \left(\frac{n_1}{n_2} \sin \theta_i\right)^2} + n_2 \cos \theta_i} \right|^2 \quad (\text{S3})$$

Based on these two equations, we can plot the reflectance at air/MoS<sub>2</sub> interface as function of angle of incidence as shown in Figure 13a.

**Table S5. Reflectance at air/MoS<sub>2</sub> interface (light from air to MoS<sub>2</sub>)**

Reflective index<sup>3,4</sup> of air and MoS<sub>2</sub>: Air  $n_1 = 1$  and MoS<sub>2</sub>  $n_2 = 4$

| Angles/ $^\circ$ | 0    | 10     | 20     | 30     | 40     | 50     | 60     | 70     | 80     | 90     |
|------------------|------|--------|--------|--------|--------|--------|--------|--------|--------|--------|
| <b>Rs</b>        | 0.36 | 0.3655 | 0.3825 | 0.4121 | 0.4563 | 0.5175 | 0.5993 | 0.7054 | 0.8397 | 1.0053 |
| <b>Rp</b>        | 0.36 | 0.3544 | 0.3373 | 0.3073 | 0.2621 | 0.1990 | 0.1165 | 0.0268 | 0.0316 | 1.0891 |

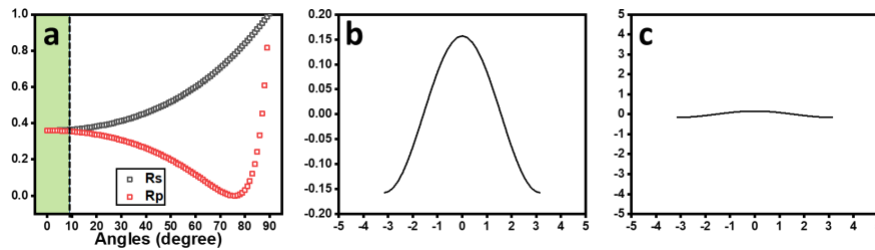

**Figure S20. Reflectance of at air/MoS<sub>2</sub> interface and sine function model of a single wrinkle structure.** (a) Reflectance of at air/MoS<sub>2</sub> interface based on equation S2 and S3, light propagates

from air to MoS<sub>2</sub> with incidence angle  $\theta_i$ . (b) and (c) Sine function model of a typical wrinkle in MoS<sub>2</sub> at different y axial scale.

Based on the AFM data, most wrinkles have an aspect ratio (amplitude/width  $\frac{A}{W}$ ) less than 0.05 and the wrinkle's contour can be modeled with the function  $y = 0.157\sin(x + 1.57)$ , as shown in Figure S13b. The actual shape of the wrinkle is clearly shown as plotting it with x and y axials in the same scale (Figure S13c). The maximum incident angles is  $\arcsin(\pm 0.157) = 9.03^\circ$  at  $x = \pm 1.57$ . Further, as shown in Figure 13a, the reflectances are close to constant when angles of incidence are smaller than  $10^\circ$ . The amount of transmittance of the lights  $T = 1 - R$  is also constant within the 0 to  $9.03^\circ$  range of incident angles, as shown in the green zone in Figure 13a. Therefore, the Fresnel effect does not obviously enhance the light absorption at the wrinkle regions.

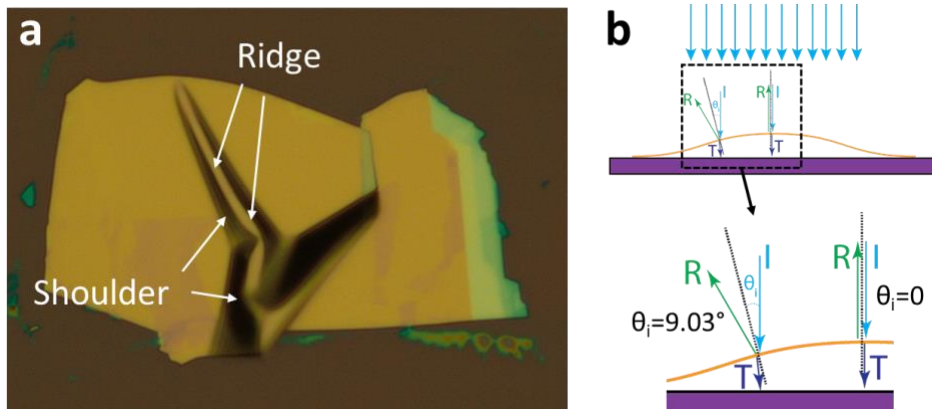

**Figure S21. Fresnel effect on wrinkled MoS<sub>2</sub> flake.** (a) Schematic side view of the Fresnel effect on single wrinkled MoS<sub>2</sub>. Blue arrows are the incident lights, green arrow are reflective lights, dark blue arrows are transmitted lights, and black dashed line is the normal of the left shoulder. (b) Bright ridges and dark shoulders on a wrinkled MoS<sub>2</sub>.

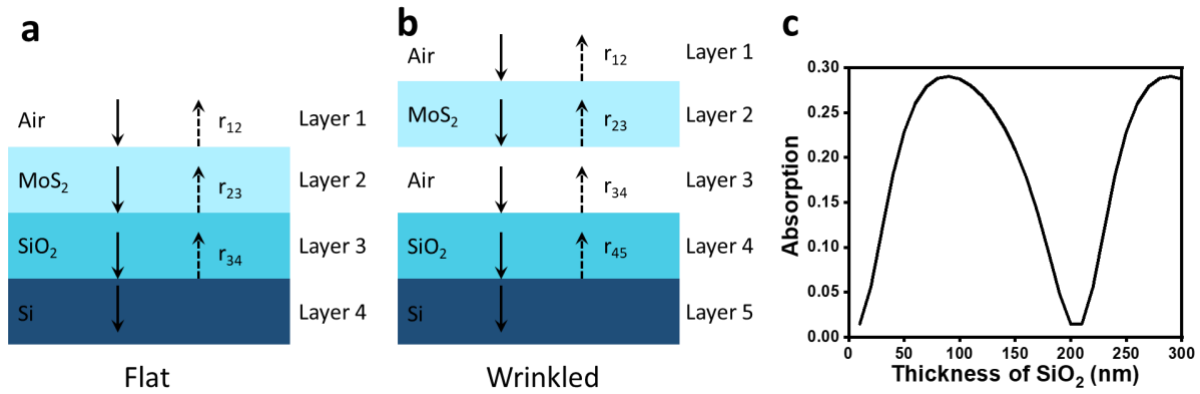

**Figure S22. Multilayer models and absorption of flat MoS<sub>2</sub> at different thickness of SiO<sub>2</sub>.**

Schematic illustration of multilayer model of wrinkled MoS<sub>2</sub> device. (b) absorption of wrinkled MoS<sub>2</sub> at different thickness of SiO<sub>2</sub>. (c) Individual Energy band diagram of individual flat and wrinkled MoS<sub>2</sub>; (d) device at no bias; and (e) wrinkled MoS<sub>2</sub> device under bias voltage. Blue and green spheres are electrons and holes, respectively. The filled arrows are the directions of carriers' moving and the unfilled arrows represent the current directions (IDS). Multilayer modes of flat (a) and single-wrinkle (b) MoS<sub>2</sub>. (c) Absorption of flat MoS<sub>2</sub> at different thickness of SiO<sub>2</sub> on silicon.

**Table S6 Absorption of wrinkled MoS<sub>2</sub> at different thickness of air gap**

| Thickness/nm | Absorption | Thickness/nm | Absorption | Thickness/nm | Absorption |
|--------------|------------|--------------|------------|--------------|------------|
| 0            | 0.2901     | 36           | 0.2962     | 72           | 0.281      |
| 3            | 0.2917     | 39           | 0.2957     | 75           | 0.2789     |
| 6            | 0.293      | 42           | 0.295      | 78           | 0.2767     |
| 9            | 0.2941     | 45           | 0.2942     | 81           | 0.2743     |
| 12           | 0.295      | 48           | 0.2933     | 84           | 0.2717     |
| 15           | 0.2958     | 51           | 0.2922     | 87           | 0.269      |
| 18           | 0.2963     | 54           | 0.291      | 90           | 0.2662     |
| 21           | 0.2967     | 57           | 0.2897     | 93           | 0.2632     |
| 24           | 0.2969     | 60           | 0.2882     | 96           | 0.2601     |
| 27           | 0.297      | 63           | 0.2866     | 99           | 0.2568     |
| 30           | 0.2969     | 66           | 0.2849     | 102          | 0.2533     |

**Table S7 Absorption of flat MoS<sub>2</sub> at different thickness of SiO<sub>2</sub>**

| Thickness/nm | Absorption | Thickness/nm | Absorption | Thickness/nm | Absorption |
|--------------|------------|--------------|------------|--------------|------------|
| 10           | 0.0146     | 110          | 0.2801     | 210          | 0.0146     |
| 20           | 0.0558     | 120          | 0.2688     | 220          | 0.0558     |
| 30           | 0.1197     | 130          | 0.2534     | 230          | 0.1197     |
| 40           | 0.1816     | 140          | 0.2336     | 240          | 0.1816     |
| 50           | 0.229      | 150          | 0.2087     | 250          | 0.229      |
| 60           | 0.2605     | 160          | 0.1775     | 260          | 0.2605     |
| 70           | 0.2791     | 170          | 0.1391     | 270          | 0.2791     |
| 80           | 0.2883     | 180          | 0.0941     | 280          | 0.2883     |
| 90           | 0.2905     | 190          | 0.0475     | 290          | 0.2905     |
| 100          | 0.2875     | 200          | 0.0142     | 300          | 0.2875     |

**References in Electronic Supplementary Information**

- 1 D. Lloyd, X. Liu, J. W. Christopher, L. Cantley, A. Wadehra, B. L. Kim, B. B. Goldberg, A. K. Swan and J. S. Bunch, *Nano Lett.*, 2016, **16**, 5836–5841.
- 2 S. Deng, E. Gao, Z. Xu and V. Berry, *ACS Appl. Mater. Interfaces*, 2017, **9**, 7812–7818.
- 3 H. Zhang, Y. Ma, Y. Wan, X. Rong, Z. Xie, W. Wang and L. Dai, *Sci. Rep.*, 2015, **5**, 8440.
- 4 A. R. B. and H. P. Hughes, *J. Phys. C Solid State Phys.*, 1979, **12**, 881.
- 5 Z. Yin, H. Li, H. Li, L. Jiang, Y. Shi, Y. Sun, G. Lu, Q. Zhang, X. Chen and H. Zhang, *ACS Nano*, 2012, **6**, 74–80.
- 6 E. Lind, A. I. Persson, L. Samuelson and L.-E. Wernersson, *Nano Lett.*, 2006, **6**, 1842–1846.
- 7 D. R. Khanal and J. Wu, *Nano Lett.*, 2007, **7**, 2778–2783.
